# Supplementary material for: Variant Ionotropic Receptors in the Malaria Vector Mosquito Anopheles gambiae Tuned to Amines and Carboxylic Acids
Source: PubMed Central journal article supplement (PMC5220300; doi:10.1038/srep40297), 2017-01-09

Variant Ionotropic Receptors in the Malaria Vector Mosquito *Anopheles gambiae*  
Tuned to Amines and Carboxylic Acids.

R. Jason Pitts<sup>1,2\*</sup>, Stephen L. Derryberry, Jr.<sup>1\*</sup>, Zhiwei Zhang<sup>1,3</sup> and Laurence J  
Zwiebel<sup>1,2,4</sup>

Author Affiliations:

<sup>1</sup>Department of Biological Sciences, Vanderbilt University, Nashville, Tennessee,  
USA

<sup>2</sup>Vanderbilt Institute for Global Health, Nashville, Tennessee, USA

<sup>3</sup>College of Forestry, Shanxi Agricultural University, Shanxi, P. R. China

<sup>4</sup>Department of Pharmacology, Vanderbilt Brain Institute, Program in  
Developmental Biology and Institute of Chemical Biology, Vanderbilt University  
Medical Center, Nashville, Tennessee, USA

*Correspondence to be sent to: Laurence J. Zwiebel, Department of Biological  
Sciences, Vanderbilt University, Nashville, USA. email: l.zwiebel@vanderbilt.edu*

\* these authors contributed equally to this work

**Supplemental Figure S1. *In situ* and immunohistochemistry localization controls.**

(A-D) Double *in situ* hybridization using sense RNA probes *AgIr76b* (green) and *AgOrco* (red). (E-H) *In situ* hybridization control using an *AgIr76b* sense RNA probe (green) plus immunohistochemical localization of *AgOrco* using an anti-Orco antibody (red). Scale bars ~50  $\mu\text{m}$ .

**Supplemental Figure S2. Control responses of *Xenopus laevis* oocytes to amine/imines.**

Responses to unitary compounds [ $10^{-4}$  M] from oocytes that were co-injected with cRNAs encoding the subunits indicated in the color keys. Mean responses ( $\pm$  SEM) were normalized against the maximum responses to pyrrolidine of *AgIr41a* + *AgIr25a/76b* (A), or *AgIr41c* + *AgIr25a/76b* (B).  $n = 4$  oocytes each.

**Supplemental Figure S3. Control responses of *Xenopus laevis* oocytes to carboxylic acids.**

Mean responses ( $\pm$  SEM) to blends of compounds (each at [ $10^{-4}$  M]) from oocytes that were coinjected with cRNAs encoding the subunits indicated in the color keys. Responses were normalized against the maximum responses to carboxylic acid blend #15 (see Table S1) of *AgIr75k* + *AgIr8a*. *AgIr75l* + *AgIr8a* responded with very low amplitude (~50 nA) to blend #15 in a single trial, while no other *AgIr* combinations responded to either blend.  $n = 3-5$  oocytes each.

**Supplemental Table S1.** *Ag1r* transcript abundances in *An. gambiae* chemosensory tissues. Units are given in Reads per Kilobase per Million Reads (RPKM).

**Supplemental Table S2.** Compounds used for screening *Ag1r* responses in *Xenopus laevis* oocytes and arranged by chemical class (column A), compound name (column B) and blend groupings used in the initial screens (column C).

**Supplemental Table S3.** Effective concentrations at half maximal compound responses ( $EC_{50}$ ) for listed *Ag1r* complexes expressed in *Xenopus laevis* oocytes.

**Supplemental Table S4.** Cloning primers and peptide translations for full-length *Ag1r* transcripts functionally characterized in this study.

Fig. S1

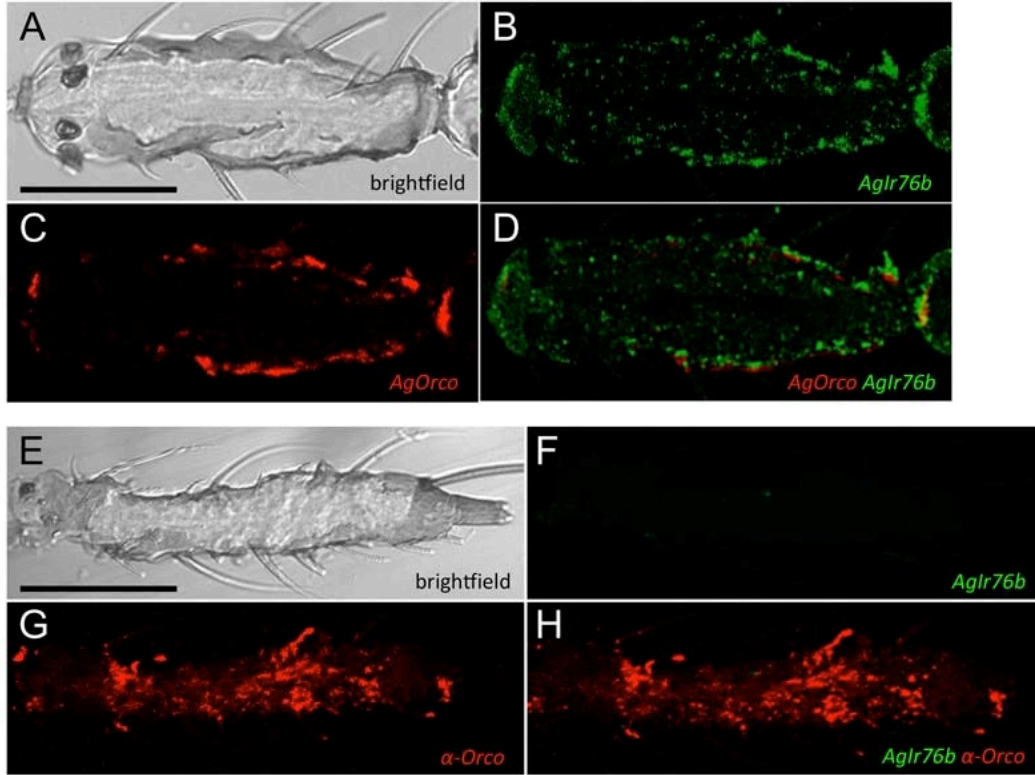

Fig. S2

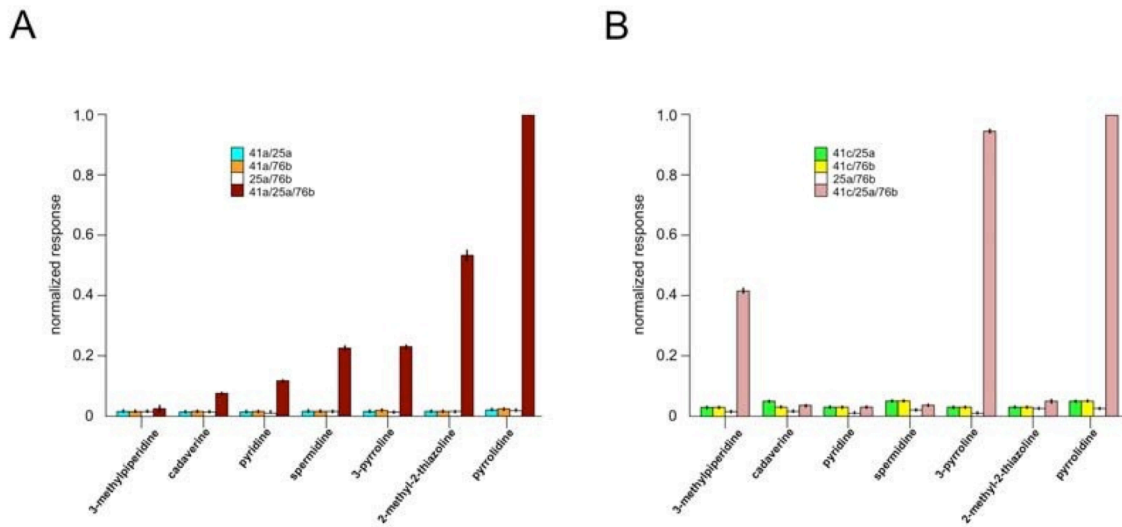

Fig. S3

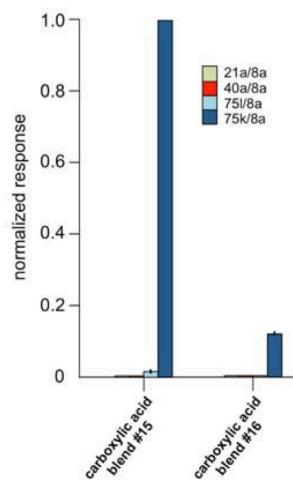

Supplement: srep40297-s1.pdf [file srep40297-s1.pdf]
